# Supplementary material
Source: PubMed Central journal article supplement (PMC2820948)
Supplement: supp_76_4_1251__1.pdf [file supp_76_4_1251__1.pdf]

**Table S1.** Primers used for cloning.

|                  |                                                                                                         |
|------------------|---------------------------------------------------------------------------------------------------------|
| RemoveFor        | GCAGATATCCAGCACAGTGGCGGCCGCTCGAGTCTAGAGGGCCCTTCGAATGAGTTTAAACCCGCTGATCTGATAA<br>CAACAGTGTAGATG          |
| RemoveRev        | CATCTACACTGTTGTTATCAGATCAGCGGGTTTAAACTCATTTCGAAGGGCCCTCTAGACTCGAGCGGCCGCCACTG<br>TGCTGGATATCTGC         |
| CipA1For         | CGGCCGCTCGAGAATGCAACACCGACCAAGGGAGC                                                                     |
| CipA3Rev         | GCGGGTTTAAACTCACGTAGAATCGAGACCGAGGAGAGGGTTAGGGATAGGCTTACCTTCGAAGGGCCATTTCGAA<br>TCATCTGTCCGGTGTGTTACAGG |
| CipA3For         | CGGCCGCTCGAGGTATCGGCCGCCACAATGACAGTTCGAG                                                                |
| egl2For2         | GAGAGAAGCTCATCATCACCATCACCATGGTCAGCAGACTGTCTGGGGCCA                                                     |
| egl2Rev2         | GTAGAGGACCCACCTCCTCCAGATCCCCATGGCTTTCTTGCGAGACACG                                                       |
| cbh2For          | GCAGAAGGCTCTTTGGACAAGAGAGAAGCTCGGCCGGATTATAAAGATGACGATGACAAACAAGCTTGCTCAAGCG<br>TCTGGGGCCAATG           |
| cbh2Rev          | GTAGAGGACCCACCTCCTCCAGATCCCCATGGCAGGAACGATGGGTTTGCCTTTGTGAGAAGC                                         |
| bgl1For3         | GTTTTATTTCGCAGCATCCTCCGCATTAGCTGCAGGTGAACAAAACTCATCTCAGAAGAGGATCTGGATGAACTGG<br>CGTTCTCTCCTCCATTCTATCCC |
| bgl1Rev3         | CGTCGCCATTTACATCACCGTAAACAACCTGAGGAGAACCTCCACCGCCACTACCCCCGGGTTGCACCTTCGGGAG<br>CGCTGCGTGAAGGGGC        |
| BsaXIFor         | GACCACACCTTACCAGCATGACTAGCCAGCTTTTGTTCCT                                                                |
| BsaXIRevRevised  | GGAGAGCGCACGAGGGAGCT                                                                                    |
| GAL10For         | CTGATTAATTACCCAGAAATAAGGCTAAAAAACTAATCGCATTATCATC                                                       |
| GAL10RevRevised  | CAAGACAATCAAAACCTTCATTTATATTGAATTTTCAAAAATTCTTACTTTTTTTTTTGG                                            |
| PreproForRevised | CCAAAAAAAAGTAAGAATTTTTGAAAATTCATATAAATGAAGGTTTTGATTGTCTTG                                               |
| PreproRev        | CCTAGGTACGATTTGTCATCGTCATCTTTATAATCCGGCCGAGCTTCTCTCTTGTC                                                |
| DR1For           | GATTATAAAGATGACGATGACAAATACGTACCTAGGAAAGAAGAACATGTGATCATCCAGGCCG                                        |
| DR1Rev           | CCATATGGGACCCACCTCCTCCAGATCCGAGCTCCTTGCTCTGTGCAGATTCAGATCG                                              |
| C-mycFor         | GAGCTCGGATCTGGAGGAGGTGGGTCCCATATGGAACAAAACTCATCTCAGAAGAGGATCTGTGATGGACTTCTT<br>CGCCAGAGGTTTGGTCAAGTCTC  |
| ADH1Rev          | AGGGAACAAAAGCTGGCTAGTCATGCCGGTAGAGGTGTGGTC                                                              |
| AGA2For          | GGCAGTAACCTGGCCCCACAAACCTTCAAATGAACG                                                                    |
| pYD1Rev          | GTCGATTTTGTACATCTACAC                                                                                   |
| 9E-docStFor      | CCATGGGGATCTGGAGGAGGTGGGTCCCTCTACTAAATTATACGGCGACGTC                                                    |

|               |                                                                                                    |
|---------------|----------------------------------------------------------------------------------------------------|
| 9E-docStRev   | GACTTGACCAAACCTCTGGCGAAGAAGTCCATTAGTTCTTGTACGGCAATGTA                                              |
| G1A2For1      | GCGATTAGTTTTTTAGCCTTATTTCTGGGG                                                                     |
| G1A2Rev1      | ACCTGCAGCTAATGCGGAGGATGCTGCGAATAAACTGCAGTAAAAATTGAAGGAAATCTCATGGTTTTTTCTCCT<br>TGACGTTAAAGTATAGAGG |
| G1A2For2      | CCTCAGGTTGTTTACGGTGATGTAAATGGCGACG                                                                 |
| G1A2Rev2      | GAGATCCGCTTATTTAGAAGTGTCGAATTCCTAATAAGGTAGGTGGGGTATGCTCTTTATC                                      |
| G1A2For3      | GAATTCGACACTTCTAAATAAGCGGATCTC                                                                     |
| G1A2Rev3      | GTAATACGACTCACTATAGGGCGAATTGGGCTCGAGGGCATGCGAAGGAAAATG                                             |
| G10A1For1     | GTACAGATCCCGACCCATTTGC                                                                             |
| G10A1Rev1     | CGCTTAACTGCTCATTGCTATATTGAAGTACGGATTAGAAGCCGCCGAGCGGGTGACAGC                                       |
| G10A1For2     | GTACTTCAATATAGCAATGAGCAGTTAAGCG                                                                    |
| G10A1Rev2     | ACCATGGTGTGGTGTATGATGAGCTTCTCTCTTGTCCAAAGAGCC                                                      |
| G10A1For3     | CCATGGGGATCTGGAGGAGGTGGG                                                                           |
| G10A1Rev3     | CTAAAGGGAACAAAAGCTGGCTAGTCATGCCGGTAGAGGTGTGGTC                                                     |
| G10A1For4     | GACCACACCTCTACCGGCATGACTAGCCAGCTTTTGTTCCTTTAG                                                      |
| G10A1Rev4     | CCTGGTATCTTTATAGTCCTG                                                                              |
| BGL1-ctrl-For | GGGCCCCCCTCGAGGTGACGGTATCGATACGGATTAGAAGCCGCCGAGCGGGTGACAG                                         |
| BGL1-ctrl-Rev | CAATTAACCCTCACTAAAGGGAACAAAAGCTGGAGCTCCTCGAGGGCATGCGAAGGAAAATGAGAAATATCG                           |
| EGII-ctrl-For | GGGCCCCCCTCGAGGTGACGGTATCGATATCGCTTCGCTGATTAATTACCCAG                                              |
| EGII-ctrl-Rev | CAATTAACCCTCACTAAAGGGAACAAAAGCTGGAGCTCCATGCCGGTAGAGGTGTGGTCAATAAGAGC                               |

**Table S2.** PCR fragment sets for plasmid construction using the DNA assembler method (1).

| Template                           | Primer pairs                | PCR product |
|------------------------------------|-----------------------------|-------------|
| pYD1                               | BsaXIFor/BsaXIRevRevised    | F0          |
| Yeast genomic DNA                  | GAL10For/GAL10RevRevised    | F1          |
| pRSGAL                             | PreproForRevised/PreproRev  | F2          |
| NW1                                | DR1For/DR1Rev               | F3          |
| Yeast genomic DNA                  | C-mycFor/ADH1Rev            | F4          |
| pYD1                               | AGA2For/pYD1Rev             | F5          |
| <i>T. reesei</i> cDNA              | cbh2For/cbh2Rev             | FLAG-CBHII  |
| <i>C. thermocellum</i> genomic DNA | 9E-docStFor/9E-docStRev     | docS        |
| pYD1                               | G1A2For1/G1A2Rev1           | G1A2-HR1    |
| <i>A. aculeatus</i> cDNA           | bgl1For3 / bgl1Rev3         | c-Myc-BGL1  |
| <i>C. thermocellum</i> gDNA        | G1A2For2/G1A2Rev2           | docAt       |
| Yeast genomic DNA                  | G1A2For3/G1A2Rev3           | ADH2        |
| pYD1                               | G10A1For1/ G10A1Rev1        | G10A1-HR1   |
| pRS425-CBHII                       | G10A1For2/ G10A1Rev2        | G10A1-HR2   |
| pRS425-CBHII                       | G10A1For3/ G10A1Rev3        | G10A1-HR3   |
| pYD1                               | G10A1For4/ G10A1Rev4        | G10A1-HR4   |
| <i>T. reesei</i> cDNA              | egl2For2/ egl2Rev2          | HisG-EGII   |
| pRS425-CBHII-BGL1                  | BGL1-ctrl-For/BGL1-ctrl-Rev | BGL1-ctrl   |
| pYD1-R1-EGII                       | EGII-ctrl-For/EGII-ctrl-Rev | EGII-ctrl   |

1. **Shao, Z., H. Zhao, and H. Zhao.** 2009. DNA assembler, an *in vivo* genetic method for rapid construction of biochemical pathways. *Nucleic Acids Res* **37**:e16.
